# Supplementary material for: Exploring microRNA Biomarker for Amyotrophic Lateral Sclerosis
Source: MDPI journal article supplement (doi:10.3390/ijms19051318), 2018-04-28
Supplement: s1 [file s1]

Table S1. KEGG pathways enriched in targeted genes by the 24 upregulated miRNAs in **Error! Reference source not found.** \* denotes these pathways are targeted by both upregulated and downregulated miRNAs.

| KEGG pathway                                             | p-value  | #genes | #miRNAs |
|----------------------------------------------------------|----------|--------|---------|
| Proteoglycans in cancer                                  | 1.67E-19 | 141    | 22      |
| Renal cell carcinoma                                     | 1.26E-09 | 56     | 22      |
| Protein processing in endoplasmic reticulum*             | 1.89E-09 | 118    | 22      |
| Viral carcinogenesis                                     | 3.38E-09 | 135    | 23      |
| Adherens junction*                                       | 3.60E-09 | 59     | 21      |
| TGF-beta signaling pathway*                              | 5.27E-09 | 59     | 23      |
| Hippo signaling pathway*                                 | 2.34E-08 | 97     | 23      |
| Cell cycle*                                              | 5.67E-08 | 90     | 22      |
| Bacterial invasion of epithelial cells                   | 1.30E-07 | 57     | 20      |
| Fatty acid metabolism                                    | 6.05E-07 | 27     | 19      |
| Lysine degradation                                       | 6.09E-07 | 33     | 19      |
| Colorectal cancer*                                       | 6.29E-07 | 48     | 21      |
| p53 signaling pathway                                    | 9.69E-07 | 53     | 20      |
| N-Glycan biosynthesis                                    | 1.51E-06 | 35     | 18      |
| Biosynthesis of unsaturated fatty acids                  | 1.77E-06 | 16     | 16      |
| Thyroid hormone signaling pathway                        | 3.27E-06 | 81     | 22      |
| Prostate cancer                                          | 3.34E-06 | 65     | 22      |
| Shigellosis                                              | 4.34E-06 | 48     | 22      |
| FoxO signaling pathway                                   | 4.34E-06 | 92     | 22      |
| Ubiquitin mediated proteolysis*                          | 4.50E-06 | 97     | 22      |
| Endometrial cancer                                       | 5.19E-06 | 41     | 20      |
| Glycosaminoglycan biosynthesis - keratan sulfate         | 6.01E-06 | 11     | 12      |
| Estrogen signaling pathway                               | 6.61E-06 | 66     | 22      |
| Pathways in cancer                                       | 6.61E-06 | 236    | 23      |
| Glioma                                                   | 9.71E-06 | 45     | 20      |
| Prion diseases                                           | 1.10E-05 | 18     | 18      |
| Pancreatic cancer                                        | 1.21E-05 | 49     | 21      |
| Hepatitis B                                              | 1.81E-05 | 92     | 23      |
| Transcriptional misregulation in cancer*                 | 1.83E-05 | 108    | 23      |
| Oocyte meiosis*                                          | 2.20E-05 | 74     | 21      |
| Endocytosis                                              | 3.54E-05 | 137    | 21      |
| Regulation of actin cytoskeleton*                        | 3.76E-05 | 129    | 22      |
| Signaling pathways regulating pluripotency of stem cells | 5.23E-05 | 88     | 21      |
| Focal adhesion*                                          | 5.73E-05 | 130    | 22      |

|                                                        |          |     |    |
|--------------------------------------------------------|----------|-----|----|
| Chronic myeloid leukemia                               | 6.68E-05 | 52  | 21 |
| Progesterone-mediated oocyte maturation                | 9.03E-05 | 62  | 21 |
| Acute myeloid leukemia                                 | 0.000236 | 41  | 21 |
| Neurotrophin signaling pathway                         | 0.000392 | 79  | 22 |
| Axon guidance                                          | 0.000564 | 73  | 21 |
| Bladder cancer                                         | 0.000649 | 30  | 18 |
| mRNA surveillance pathway*                             | 0.000649 | 62  | 21 |
| mTOR signaling pathway                                 | 0.000935 | 43  | 21 |
| Thyroid cancer                                         | 0.001001 | 21  | 19 |
| Sphingolipid signaling pathway                         | 0.001001 | 73  | 21 |
| MAPK signaling pathway                                 | 0.001631 | 144 | 22 |
| Non-small cell lung cancer                             | 0.001647 | 37  | 20 |
| Insulin signaling pathway                              | 0.002729 | 87  | 22 |
| Small cell lung cancer                                 | 0.002857 | 56  | 23 |
| Fatty acid biosynthesis                                | 0.00446  | 6   | 13 |
| Huntington's disease                                   | 0.004742 | 107 | 22 |
| Ribosome                                               | 0.005396 | 83  | 20 |
| RNA transport*                                         | 0.007227 | 99  | 22 |
| Epstein-Barr virus infection                           | 0.007274 | 122 | 23 |
| Melanoma                                               | 0.007358 | 45  | 20 |
| Arrhythmogenic right ventricular cardiomyopathy (ARVC) | 0.007778 | 36  | 20 |
| Salmonella infection                                   | 0.007778 | 54  | 22 |
| Circadian rhythm                                       | 0.00844  | 23  | 19 |
| HIF-1 signaling pathway                                | 0.011101 | 66  | 22 |
| Steroid biosynthesis                                   | 0.012579 | 13  | 14 |
| Central carbon metabolism in cancer                    | 0.012752 | 42  | 20 |
| Rap1 signaling pathway                                 | 0.013498 | 117 | 22 |
| ErbB signaling pathway                                 | 0.014677 | 55  | 22 |
| TNF signaling pathway                                  | 0.015772 | 70  | 21 |
| PI3K-Akt signaling pathway                             | 0.017214 | 187 | 23 |
| Other types of O-glycan biosynthesis                   | 0.022656 | 16  | 15 |
| Platelet activation                                    | 0.023844 | 74  | 22 |

|                                                            |          |    |    |
|------------------------------------------------------------|----------|----|----|
| Non-alcoholic fatty liver disease (NAFLD)                  | 0.024311 | 89 | 22 |
| Fc gamma R-mediated phagocytosis                           | 0.026365 | 55 | 21 |
| VEGF signaling pathway                                     | 0.026932 | 39 | 20 |
| AMPK signaling pathway*                                    | 0.026932 | 77 | 22 |
| RNA degradation                                            | 0.02877  | 50 | 22 |
| Fatty acid elongation                                      | 0.030304 | 15 | 15 |
| Gap junction                                               | 0.030378 | 51 | 20 |
| Epithelial cell signaling in Helicobacter pylori infection | 0.033539 | 42 | 16 |
| Prolactin signaling pathway                                | 0.038056 | 45 | 20 |
| Apoptosis                                                  | 0.041464 | 51 | 20 |
| Choline metabolism in cancer                               | 0.042193 | 61 | 21 |
| Dorso-ventral axis formation                               | 0.047968 | 19 | 19 |
