# Supplementary material for: Exploring microRNA Biomarker for Amyotrophic Lateral Sclerosis
Source: MDPI journal article supplement (doi:10.3390/ijms19051318), 2018-04-28
Supplement: s1 [file s1]

Table S1. URLs for DIANA-mirpath

|                                                                                                                                                                                                                                                                                                                                                                                                                                                                                                                                                                                                                                                                                                                                                                                                                                                                                                                                                                                                                                                                                                                                                                                                                                                                                                                                                                                                            |
|------------------------------------------------------------------------------------------------------------------------------------------------------------------------------------------------------------------------------------------------------------------------------------------------------------------------------------------------------------------------------------------------------------------------------------------------------------------------------------------------------------------------------------------------------------------------------------------------------------------------------------------------------------------------------------------------------------------------------------------------------------------------------------------------------------------------------------------------------------------------------------------------------------------------------------------------------------------------------------------------------------------------------------------------------------------------------------------------------------------------------------------------------------------------------------------------------------------------------------------------------------------------------------------------------------------------------------------------------------------------------------------------------------|
| URL of DIANA-mirpath for 27 downregulated miRNAs                                                                                                                                                                                                                                                                                                                                                                                                                                                                                                                                                                                                                                                                                                                                                                                                                                                                                                                                                                                                                                                                                                                                                                                                                                                                                                                                                           |
| <p><a href="http://snf-515788.vm.okeanos.grnet.gr/#mirnas=hsa-miR-3960;hsa-miR-3665;hsa-miR-4497;hsa-miR-4787-5p;hsa-miR-4466;hsa-miR-2861;hsa-miR-638;hsa-miR-4516;hsa-miR-4532;hsa-miR-4488;hsa-miR-4508;hsa-miR-4530;hsa-miR-3196;hsa-miR-4763-3p;hsa-miR-1469;hsa-miR-3940-5p;hsa-miR-4507;hsa-miR-4707-5p;hsa-miR-1281;hsa-miR-455-3p;hsa-miR-4270;hsa-miR-1825;hsa-miR-4745-5p;hsa-miR-4734;hsa-miR-3613-5p;hsa-miR-4741;hsa-miR-3185&amp;methods=Tarbase;Tarbase;Tarbase;Tarbase;Tarbase;Tarbase;Tarbase;Tarbase;Tarbase;Tarbase;Tarbase;Tarbase;Tarbase;Tarbase;Tarbase;Tarbase;Tarbase;Tarbase;Tarbase;Tarbase;Tarbase;Tarbase;Tarbase;Tarbase;Tarbase&amp;selection=0">http://snf-515788.vm.okeanos.grnet.gr/#mirnas=hsa-miR-3960;hsa-miR-3665;hsa-miR-4497;hsa-miR-4787-5p;hsa-miR-4466;hsa-miR-2861;hsa-miR-638;hsa-miR-4516;hsa-miR-4532;hsa-miR-4488;hsa-miR-4508;hsa-miR-4530;hsa-miR-3196;hsa-miR-4763-3p;hsa-miR-1469;hsa-miR-3940-5p;hsa-miR-4507;hsa-miR-4707-5p;hsa-miR-1281;hsa-miR-455-3p;hsa-miR-4270;hsa-miR-1825;hsa-miR-4745-5p;hsa-miR-4734;hsa-miR-3613-5p;hsa-miR-4741;hsa-miR-3185&amp;methods=Tarbase;Tarbase;Tarbase;Tarbase;Tarbase;Tarbase;Tarbase;Tarbase;Tarbase;Tarbase;Tarbase;Tarbase;Tarbase;Tarbase;Tarbase;Tarbase;Tarbase;Tarbase;Tarbase;Tarbase;Tarbase;Tarbase;Tarbase;Tarbase;Tarbase&amp;selection=0</a></p>                                               |
| URL of DIANA-mirpath for 24 upregulated miRNAs                                                                                                                                                                                                                                                                                                                                                                                                                                                                                                                                                                                                                                                                                                                                                                                                                                                                                                                                                                                                                                                                                                                                                                                                                                                                                                                                                             |
| <p><a href="http://snf-515788.vm.okeanos.grnet.gr/index.php?r=mirpath#mirnas=hsa-miR-1290;hsa-miR-106b-5p;hsa-miR-26a-5p;hsa-miR-451a;hsa-miR-181a-5p;hsa-miR-151a-5p;hsa-miR-17-5p;hsa-let-7i-5p;hsa-miR-106a-5p;hsa-miR-2278;hsa-miR-99b-3p;hsa-miR-760;hsa-miR-584-5p;hsa-let-7d-5p;hsa-miR-3175;hsa-miR-4306;hsa-miR-130b-3p;hsa-miR-324-3p;hsa-miR-221-3p;hsa-miR-744-5p;hsa-miR-25-3p;hsa-miR-4485-3p;hsa-miR-378i;hsa-miR-652-3p;hsa-miR-2392;hsa-let-7a-5p&amp;methods=Tarbase;Tarbase;Tarbase;Tarbase;Tarbase;Tarbase;Tarbase;Tarbase;Tarbase;Tarbase;Tarbase;Tarbase;Tarbase;Tarbase;Tarbase;Tarbase;Tarbase;Tarbase;Tarbase;Tarbase;Tarbase;Tarbase;Tarbase;Tarbase;Tarbase&amp;selection=0">http://snf-515788.vm.okeanos.grnet.gr/index.php?r=mirpath#mirnas=hsa-miR-1290;hsa-miR-106b-5p;hsa-miR-26a-5p;hsa-miR-451a;hsa-miR-181a-5p;hsa-miR-151a-5p;hsa-miR-17-5p;hsa-let-7i-5p;hsa-miR-106a-5p;hsa-miR-2278;hsa-miR-99b-3p;hsa-miR-760;hsa-miR-584-5p;hsa-let-7d-5p;hsa-miR-3175;hsa-miR-4306;hsa-miR-130b-3p;hsa-miR-324-3p;hsa-miR-221-3p;hsa-miR-744-5p;hsa-miR-25-3p;hsa-miR-4485-3p;hsa-miR-378i;hsa-miR-652-3p;hsa-miR-2392;hsa-let-7a-5p&amp;methods=Tarbase;Tarbase;Tarbase;Tarbase;Tarbase;Tarbase;Tarbase;Tarbase;Tarbase;Tarbase;Tarbase;Tarbase;Tarbase;Tarbase;Tarbase;Tarbase;Tarbase;Tarbase;Tarbase;Tarbase;Tarbase;Tarbase;Tarbase;Tarbase;Tarbase&amp;selection=0</a></p> |
